# Supplementary material for: Molecular surveillance of anti-malarial resistance pfcrt, pfmdr1, and pfk13 polymorphisms in African Plasmodium falciparum imported parasites to Wuhan, China
Source: Malar J. 2021 May 1;20:209. doi: 10.1186/s12936-021-03737-8 (PMC8087876; doi:10.1186/s12936-021-03737-8)
Supplement: Supplementary file 4 — Additional file 4: Table S3. Haplotypes distribution of pfcrt and pfmdr1 from different areas. [file 12936_2021_3737_MOESM4_ESM.xlsx]

## Sheet: Sheet1
Table S3 Haplotypes distribution of pfcrt and pfmdr1 from different areas.
Areab	Country	Pfcrt						Pfmdr1
		No.c	WTd	Mutatione		Mixed typee		No.c	WTd	Mutatione		Mixed typee
			CVMNK (%)	CVIET (%)	SVMNT (%)	CV M/I N/E K/T (%)			NY (%)	NF (%)	YF (%)	N Y/F (%)	Y Y/F(%)	N/Y Y/F (%)
WA	Nigeria	18	16(88.89)	1(5.56)	0(00.00)	1(5.56)		18	4(22.22)	9(50.00)	1(5.56)	3(16.67)	0(00.00)	1(5.56)
	Liberia	2	0(00.00)	2(100.00)	0(00.00)	0(00.00)		2	1(50.00)	1(50.00)	0(00.00)	0(00.00)	0(00.00)	0(00.00)
	Guinea	4	3(75.00)	1(25.00)	0(00.00)	0(00.00)		4	2(50.00)	1(25.00)	0(00.00)	1(25.00)	0(00.00)	0(00.00)
	Sierra Leone	2	1(50.00)	1(50.00)	0(00.00)	0(00.00)		3	1(33.33)	2(66.67)	0(00.00)	0(00.00)	0(00.00)	0(00.00)
	Ghana	5	5(100.00)	0(00.00)	0(00.00)	0(00.00)		6	2(33.33)	4(66.67)	0(00.00)	0(00.00)	0(00.00)	0(00.00)
	Ivory Coast	10	9(90.00)	0(00.00)	0(00.00)	1(10.00)		10	1(10.00)	4(40.00)	0(00.00)	5(50.00)	0(00.00)	0(00.00)
	Burkina Faso	2	2(100.00)	0(00.00)	0(00.00)	0(00.00)		2	1(50.00)	1(50.00)	0(00.00)	0(00.00)	0(00.00)	0(00.00)
	Mali	2	1(50.00)	1(50.00)	0(00.00)	0(00.00)		3	1(33.33)	1(33.33)	1(33.33)	0(00.00)	0(00.00)	0(00.00)
	Cameroon	1	1(100.00)	0(00.00)	0(00.00)	0(00.00)		1	0(00.00)	1(100.00)	0(00.00)	0(00.00)	0(00.00)	0(00.00)
SA	Angola	6	6(100.00)	0(00.00)	0(00.00)	0(00.00)		6	3(50.00)	3(50.00)	0(00.00)	0(00.00)	0(00.00)	0(00.00)
	Zambia	2	2(100.00)	0(00.00)	0(00.00)	0(00.00)		3	1(33.33)	1(33.33)	0(00.00)	1(33.33)	0(00.00)	0(00.00)
	Mozambique	7	7(100.00)	0(00.00)	0(00.00)	0(00.00)		7	3(42.86)	3(42.86)	0(00.00)	1(14.29)	0(00.00)	0(00.00)
CA	Congo	23	22(95.65)	1(4.35)	0(00.00)	0(00.00)		23	9(39.13)	9(39.13)	0(00.00)	4(17.39)	1(4.35)	0(00.00)
	Chad	4	2(50.00)	2(50.00)	0(00.00)	0(00.00)		2	0(00.00)	0(00.00)	2(50.00)	0(00.00)	0(00.00)	0(00.00)
	Cameroon	1	1(100.00)	0(00.00)	0(00.00)	0(00.00)		1	0(00.00)	1(100.00)	0(00.00)	0(00.00)	0(00.00)	0(00.00)
	Gabon	3	3(100.00)	0(00.00)	0(00.00)	0(00.00)		3	2(66.67)	1(33.33)	0(00.00)	0(00.00)	0(00.00)	0(00.00)
	Equatorial Guinea	1	1(100.00)	0(00.00)	0(00.00)	0(00.00)		1	1(100.00)	0(00.00)	0(00.00)	0(00.00)	0(00.00)	0(00.00)
	Zambia	1	1(100.00)	0(00.00)	0(00.00)	0(00.00)		1	0(00.00)	0(00.00)	0(00.00)	1(100.00)	0(00.00)	0(00.00)
EA	Uganda	4	3(75.00)	0(00.00)	0(00.00)	1(25.00)		4	2(50.00)	2(50.00)	0(00.00)	0(00.00)	0(00.00)	0(00.00)
	South Sudan	1	1(100.00)	0(00.00)	0(00.00)	0(00.00)		1	0(00.00)	0(00.00)	0(00.00)	0(00.00)	0(00.00)	1(100.00)
	Tanzania	3	3(100.00)	0(00.00)	0(00.00)	0(00.00)		3	2(66.67)	1(33.33)	0(00.00)	0(00.00)	0(00.00)	0(00.00)
	Kenya	1	1(100.00)	0(00.00)	0(00.00)	0(00.00)		1	1(100.00)	0(00.00)	0(00.00)	0(00.00)	0(00.00)	0(00.00)
NA	Sudan	1	0(00.00)	1(100.00)	0(00.00)	0(00.00)		1	0(00.00)	1(100.00)	0(00.00)	0(00.00)	0(00.00)	0(00.00)
Total		104	91(87.50)	10(9.62)	0(00.00)	3(2.88）		106	37(34.91)	46(43.40)	4(3.77)	16(15.09)	1(0.94)	2(1.89)
a The haplotypes were constructed considering codon positions 72-76 of Pfcrt and codon positions 86 and 184 of Pfmdr1. b The WA, SA, CA, EA, NA and SEA represent West Africa, South Africa, Central Africa, East Africa, North Africa and Southeast Asia, respectively. c No., number. d WT, wild type. eAmino acid mutation is in bold type.
